# Supplementary material for: High photocatalytic activity of oxychloride CaBiO2Cl under visible light irradiation
Source: Royal Society of Chemistry journal article supplement (doi:10.1039/c2ce25672j), 2012-01-01
Supplement: c2ce25672j.pdf [file c2ce25672j.pdf]

## Supporting Information

### High photocatalytic activity of oxychloride $\text{CaBiO}_2\text{Cl}$ under visible light irradiation

Rui Shi<sup>a,b</sup>, Tongguang Xu<sup>b</sup>, Yongfa Zhu<sup>a,c,\*</sup>, Jun Zhou<sup>b,\*</sup>

<sup>a</sup> Department of Chemistry, Tsinghua University, Beijing, 100084, China

<sup>b</sup> Beijing Third Class Tobacco Supervision Station, Beijing 101121, China

<sup>c</sup> Jiangsu Key Laboratory of Atmospheric Environment Monitoring and  
Pollution Control, Nanjing University of Information Science and Technology,  
Nanjing 210044, China

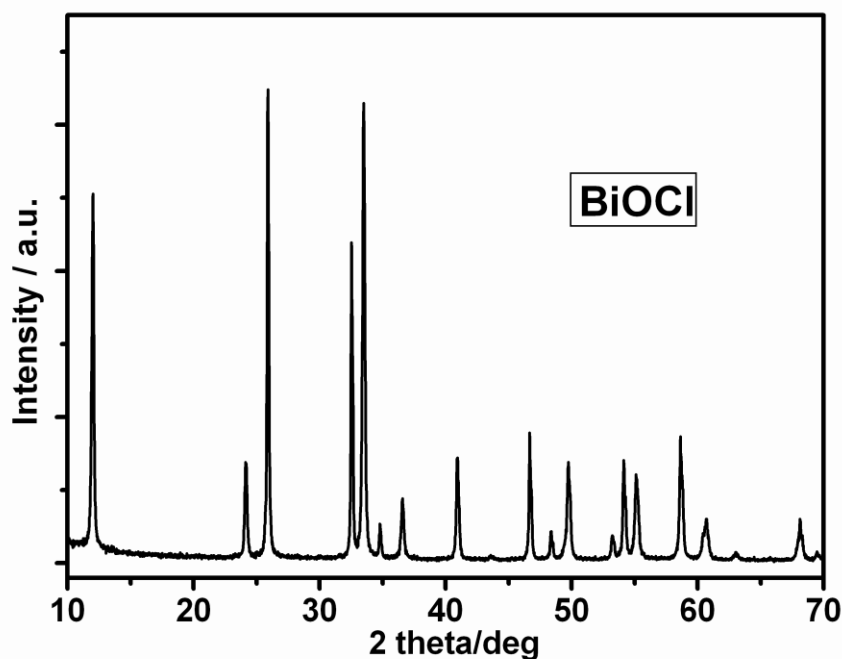

Figure S1. XRD pattern of BiOCl.

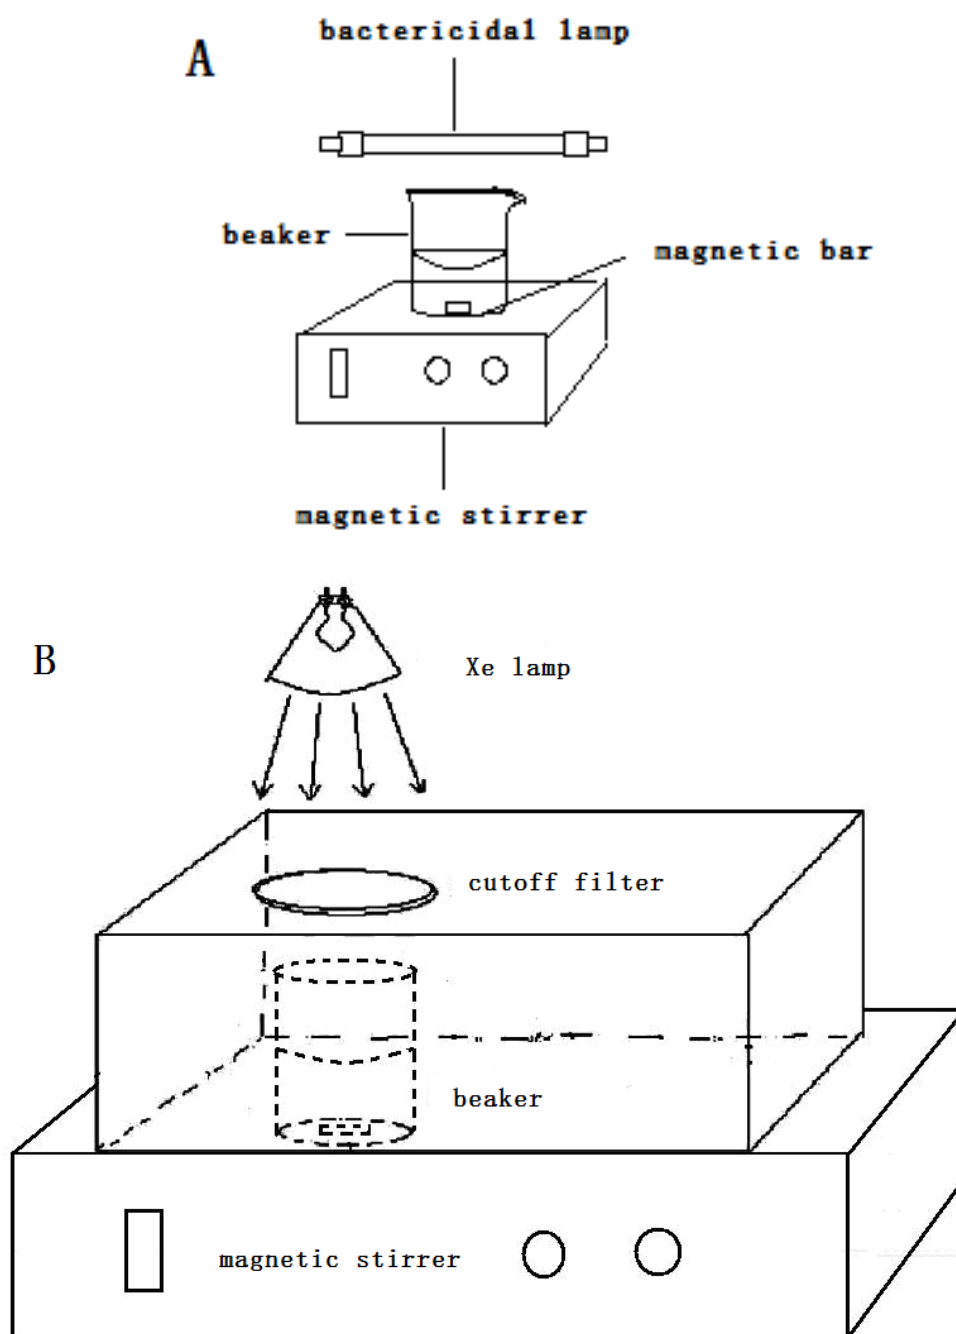

**Figure S2.** The picture of the photocatalytic instruments under UV light (A) and visible-light irradiation ( $\lambda > 400$  nm) (B).

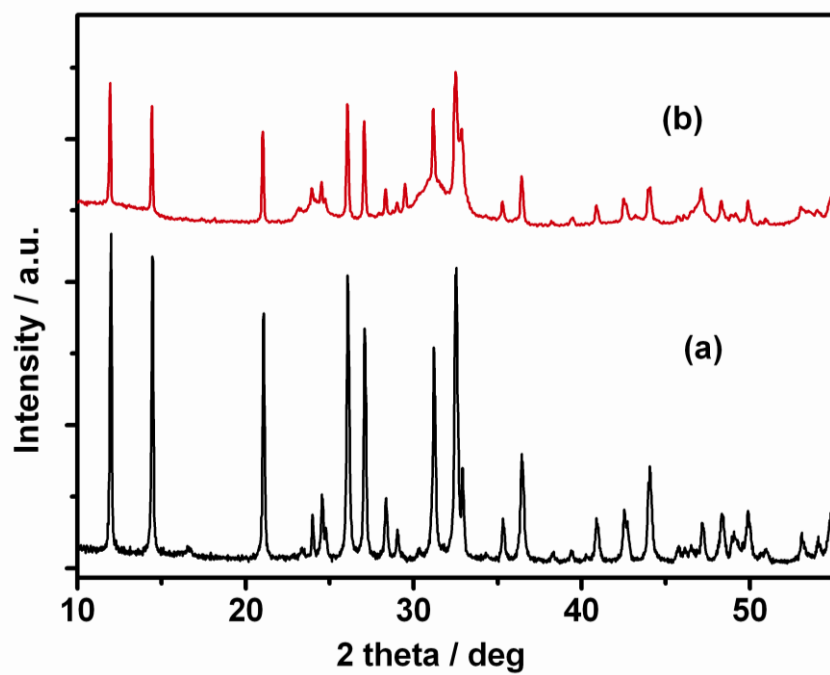

**Figure S3.** XRD pattern of  $\text{CaBiO}_2\text{Cl}$  calcinated at 900 °C before (a) and after (b) MB degradation under UV light irradiation.
